# Supplementary material for: Metal-free graphdiyne doped with sp-hybridized boron and nitrogen atoms at acetylenic sites for high-efficiency electroreduction of CO2 to CH4 and C2H4
Source: Royal Society of Chemistry journal article supplement (doi:10.1039/c8ta11825f), 2019-01-01
Supplement: c8ta11825f1.pdf [file c8ta11825f1.pdf]

## Supporting Information

### **Metal-Free Graphdiyne Doped with sp-Hybridized Boron and Nitrogen Atom at Acetylenic Sites for High-Efficient Electroreduction of CO<sub>2</sub> to CH<sub>4</sub> and C<sub>2</sub>H<sub>4</sub>**

Jia Zhao,<sup>†</sup> Zhe Chen,<sup>†</sup> Jingxiang Zhao<sup>\*,†</sup>

<sup>†</sup> College of Chemistry and Chemical Engineering, and Key Laboratory of Photonic  
and Electronic Bandgap Materials, Ministry of Education, Harbin Normal University,  
Harbin, 150025, China

\* To whom correspondence should be addressed. Email: xjz\_hmily@163.com (JZ)

**Table S1.** The total electronic energies ( $E_{\text{tot}}$ , Ha), zero-point energies (ZPE, eV), and entropy at room-temperature (TS, eV) for small molecules, including H<sub>2</sub>, H<sub>2</sub>O, CO, CO<sub>2</sub>, CH<sub>4</sub>, C<sub>2</sub>H<sub>4</sub>.

|                               | $E_{\text{tot}}$ | ZPE      |                                 | TS       |                                 |
|-------------------------------|------------------|----------|---------------------------------|----------|---------------------------------|
|                               |                  | our work | experimental value <sup>1</sup> | our work | experimental value <sup>1</sup> |
| H <sub>2</sub>                | -1.16            | 0.27     | 0.28                            | 0.42     | 0.40                            |
| H <sub>2</sub> O              | -76.39           | 0.56     | 0.56                            | 0.60     | 0.58                            |
| CO                            | -113.23          | 0.13     | 0.13                            | 0.61     | 0.61                            |
| CO <sub>2</sub>               | -188.48          | 0.31     | 0.30                            | 0.66     | 0.66                            |
| CH <sub>4</sub>               | -40.47           | 1.19     | 1.22                            | 0.64     | 0.58                            |
| C <sub>2</sub> H <sub>4</sub> | -78.50           | 1.36     | 1.34                            | 0.71     | 0.67                            |

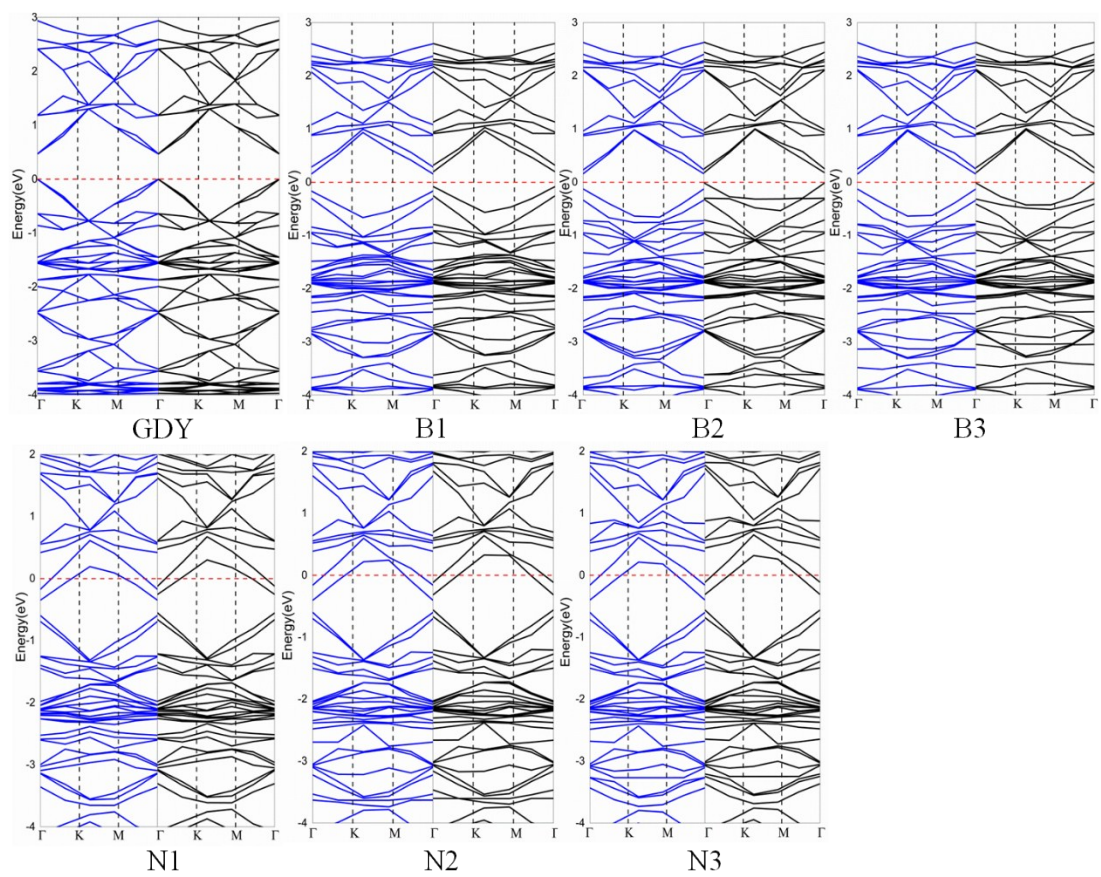

**Figure S1.** The computed band structures of pristine and various doped GDYs with B and N atom. The Fermi level is set as zero in red dotted line.

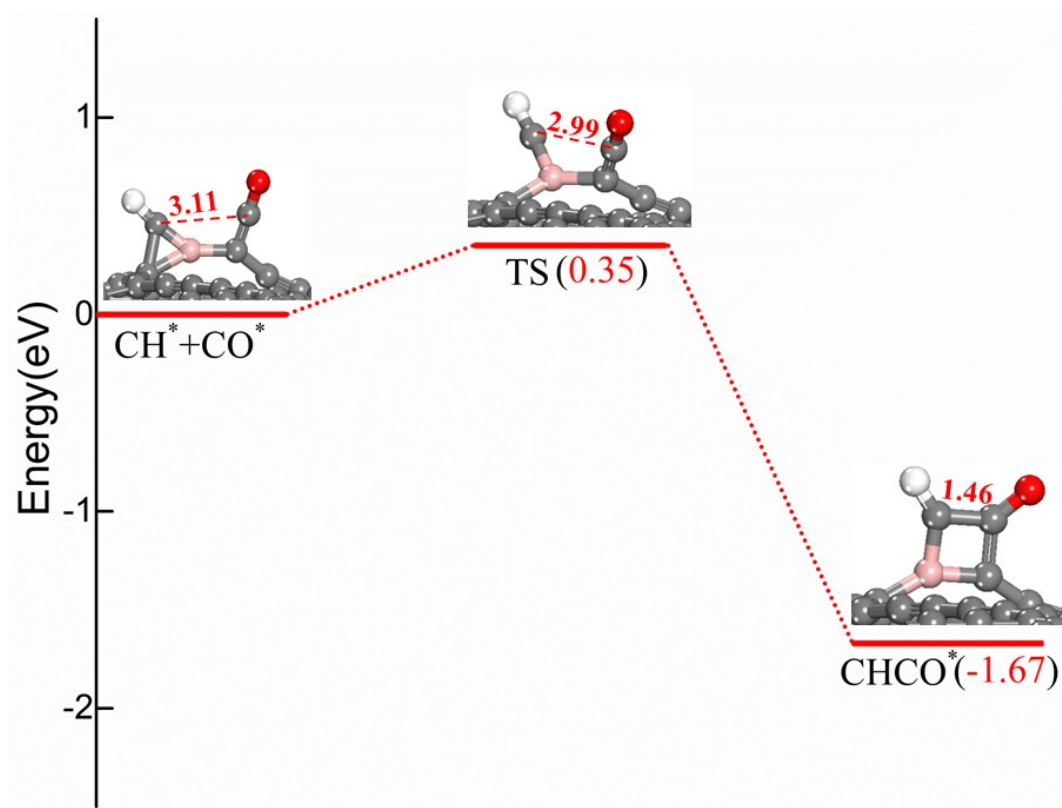

**Figure S2.** The obtained minimum reaction pathway for the C-C coupling of  $\text{CH}^*$  species with  $\text{CO}$  with LST/QST method.<sup>2</sup>

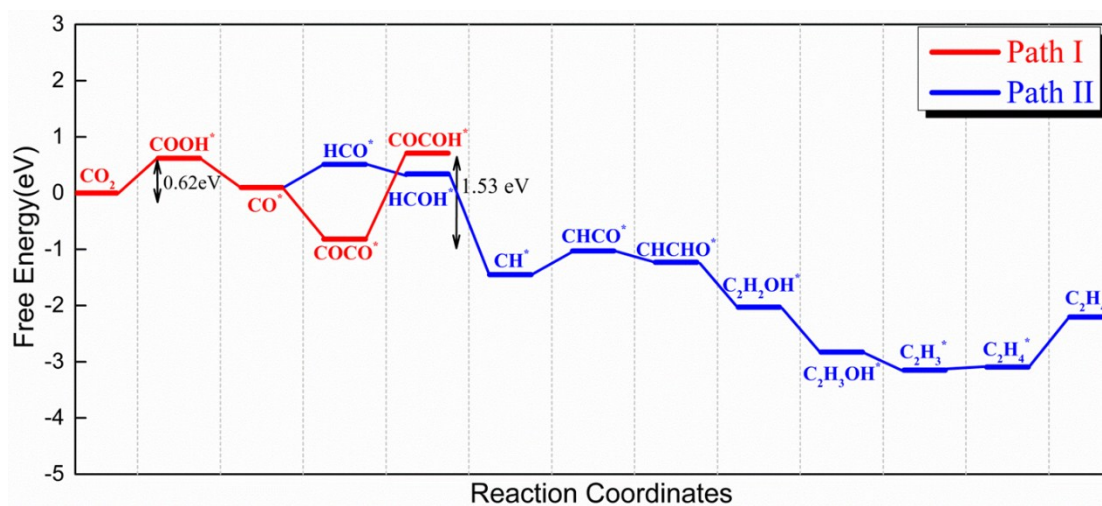

(a)

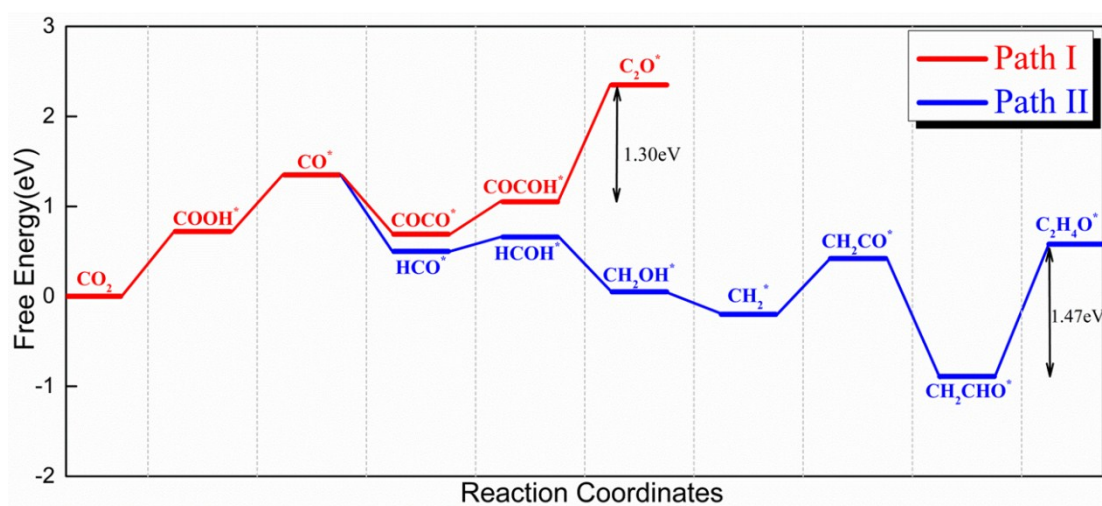

(b)

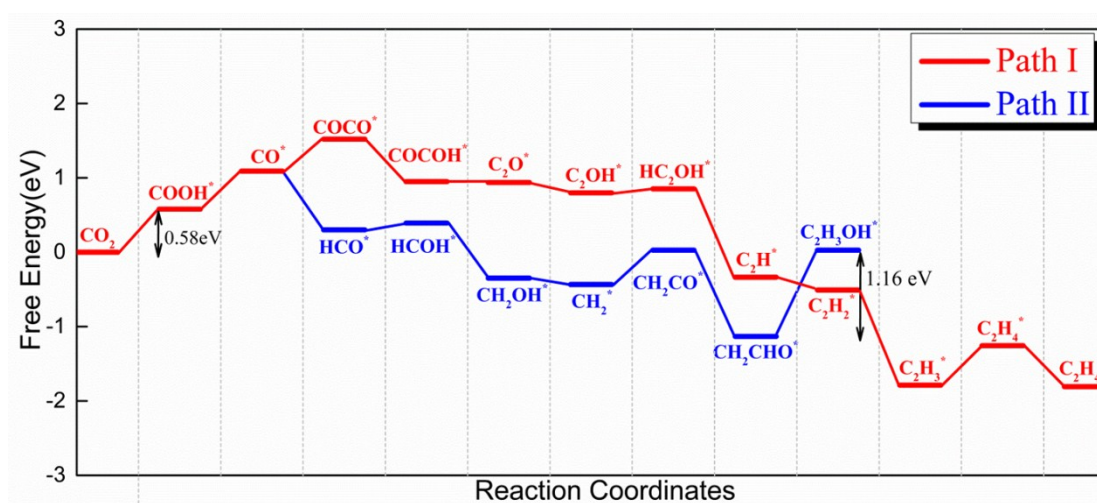

(c)

**Figure S3.** The computed free energy profiles of  $\text{CO}_2\text{ER}$  to  $\text{C}_2\text{H}_4$  along path I and II on S5

B3, N1, and N2 surfaces.

References :

1. Computational Chemistry Comparison and Benchmark Database.  
<http://cccbdb.nist.gov/>.
2. N. Govind, M. Petersen, G. Gitzgerald, D. King-Smith and J. Andzelm, *J. Comput. Mater. Sci.*, 2003, **28**, 250
